# Supplementary material for: Manipulating coordination geometry dependent electron coupling forhigh-current-density electrocatalytic water oxidation
Source: Research Square preprint supplement (doi:10.21203/rs.3.rs-1605167/v1), 2022-05-09
Supplement: Supplementary file 1 [file 6011ce54d9dafe0c8c6260bd.docx]

Supporting Information

Manipulating coordination geometry dependent electron coupling for

high-current-density electrocatalytic water oxidation

Sheng Zhao1, Feng Hu1, Lijie Yin1, Linlin Li1, Yu-Ming Chang2, Han-Yi Chen2, and Shengjie Peng1*

1College of Materials Science and Technology, Nanjing University of Aeronautics and Astronautics, Nanjing 210016, China.

2Department of Materials Science and Engineering National Tsing Hua University 101, Sec. 2, Kuang-Fu Road, Hsinchu 30013, Taiwan.

*Corresponding author.

Email: pengshengjie@nuaa.edu.cn


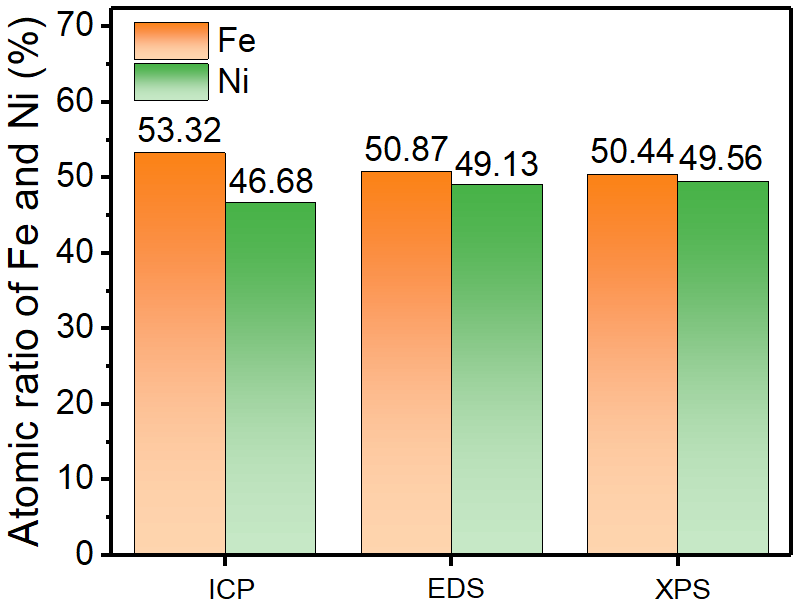


**Supplementary Fig. 1** The ratio of Fe and Ni in the sample using 3 mol FeCl3·6H2O as the precursor obtained by ICP, EDS, and XPS, respectively. Several methods of content characterization show similar results for the resultant sample.

**Supplementary Fig. 2** (a) Low magnified and (b) high magnified SEM images of NiWO4/NF.

**Supplementary Fig. 3** (a) Low magnified and (b) high magnified SEM images of FeWO4/NF.


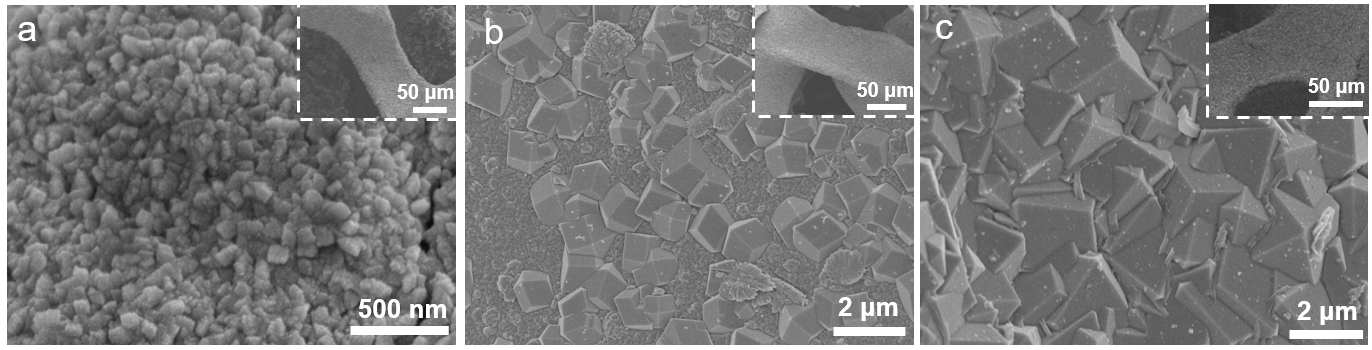


**Supplementary Fig. 4** (a-c) SEM images of Fe0.67Ni0.33WO4/NF, Fe0.59Ni0.41WO4/NF, and Fe0.51Ni0.49WO4/NF.


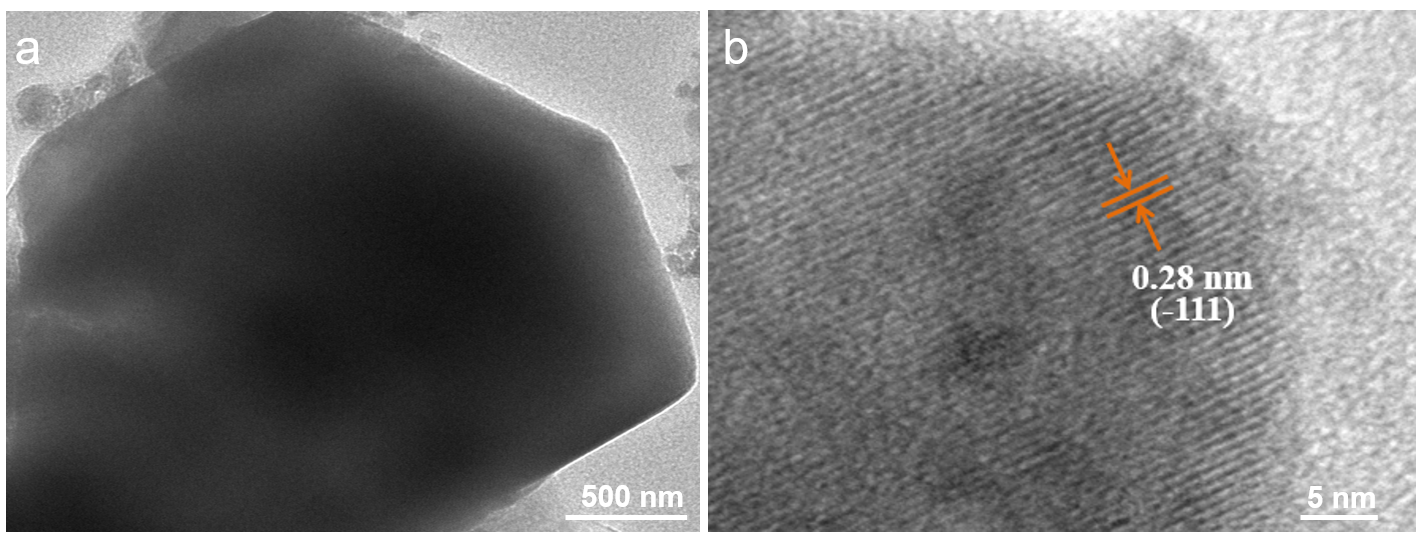


**Supplementary Fig. 5** (a) TEM and (b) HRTEM images of Fe0.53Ni0.47WO4.

**Supplementary Fig. 6**(a) XRD patterns of FeWO4/NF, NiWO4/NF, and Fe0.53Ni0.47WO4/NF. (b) The corresponding patterns at the region of 29°−32.5°.


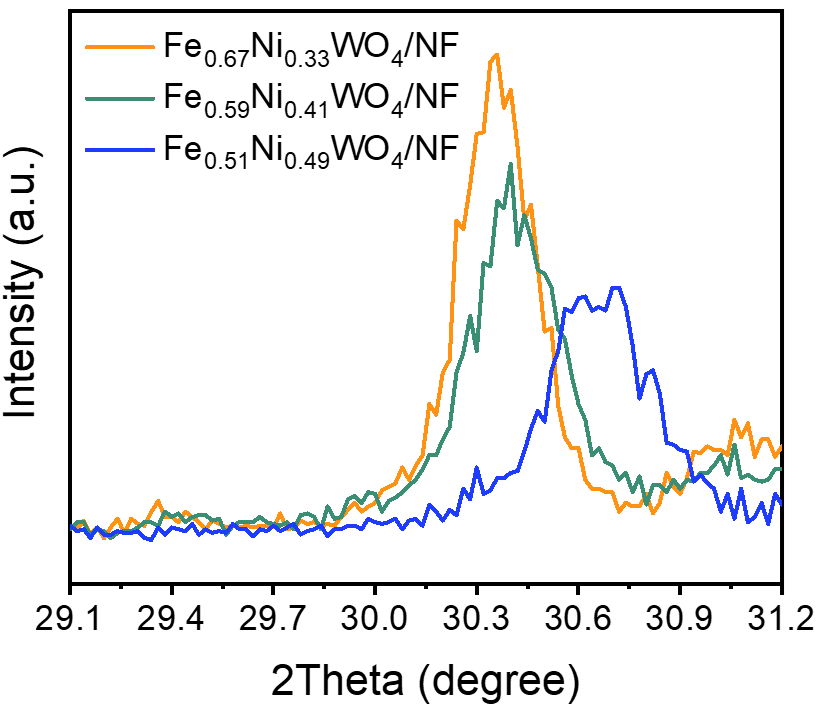


**Supplementary Fig. 7** XRD patterns at the region of 29.1°−31.2° of Fe0.67Ni0.33WO4/NF, Fe0.59Ni0.41WO4/NF, and Fe0.51Ni0.49WO4/NF.


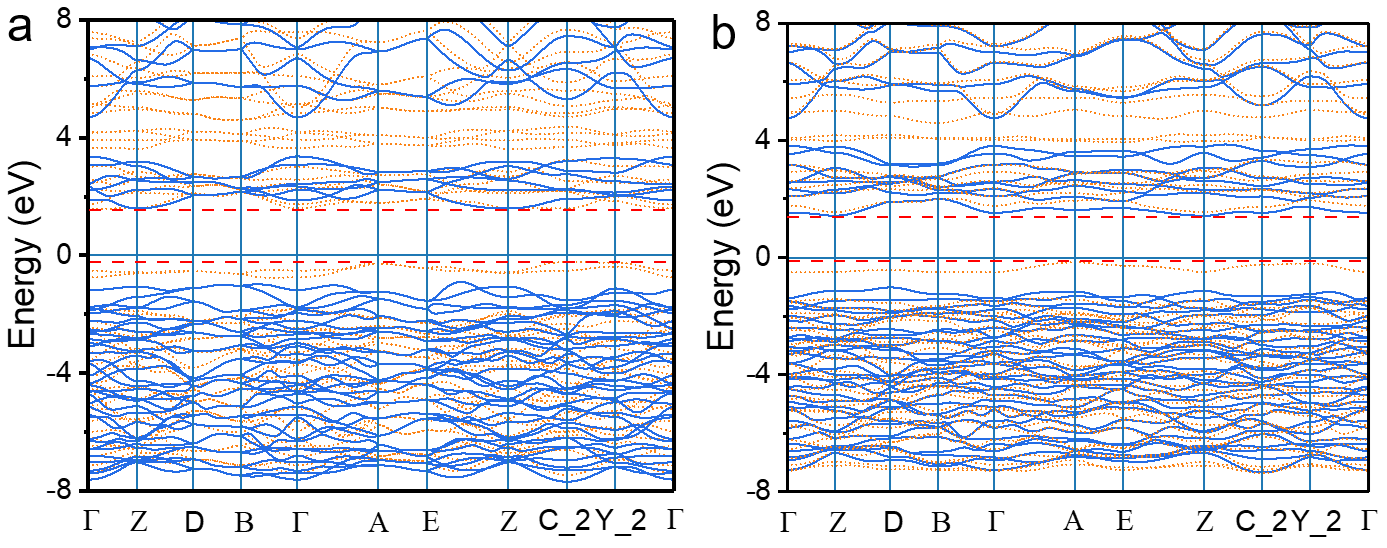


**Supplementary Fig. 8** The band structures of (a) FeWO4 and (b) Fe0.53Ni0.47WO4. The solid blue line represents the band formed by spintrons up, and the dotted orange line stands for the band formed by spintrons down.


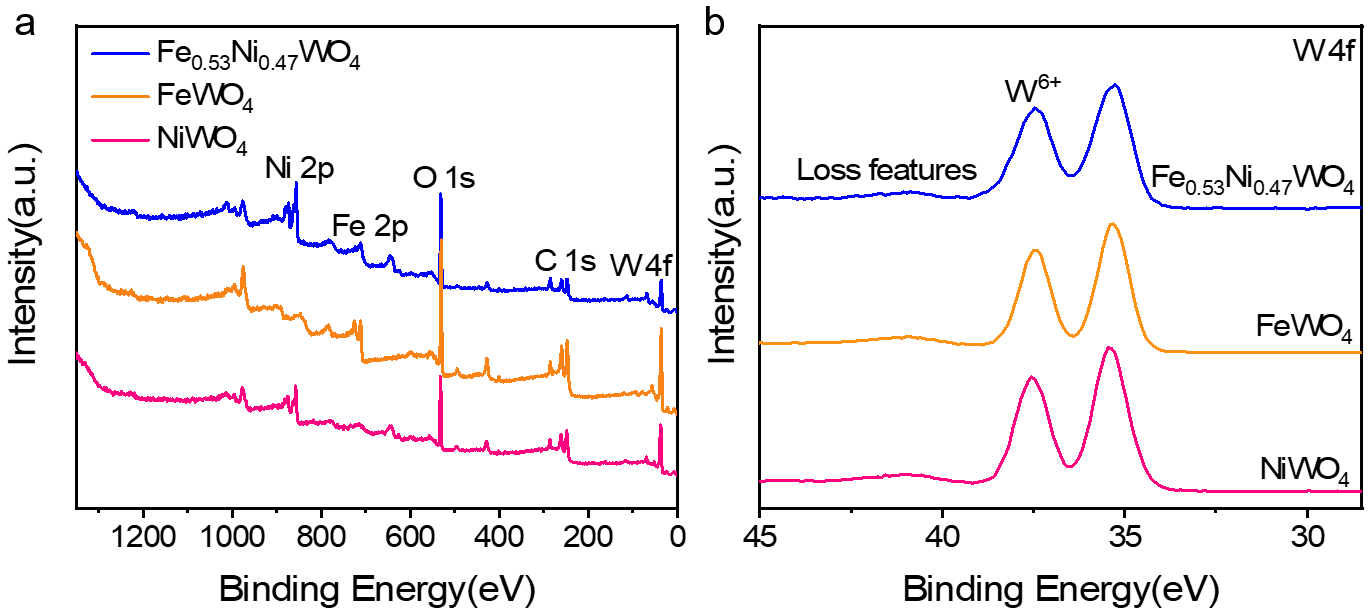


**Supplementary Fig. 9** (a) XPS survey spectra of FeWO4, NiWO4 and Fe0.53Ni0.47WO4. (b) The corresponding XPS fine spectra of W 4f. All XPS data were calibrated by the C 1s (28.48 eV). The photoelectron peaks corresponding to Fe, Ni, O, C, W elements can be observed in the XPS survey spectrum of Fe0.53Ni0.47WO4 prepared using FeCl3·6H2O as the precursor. The W 4f region shows the peaks ascribed to W6+ 1.


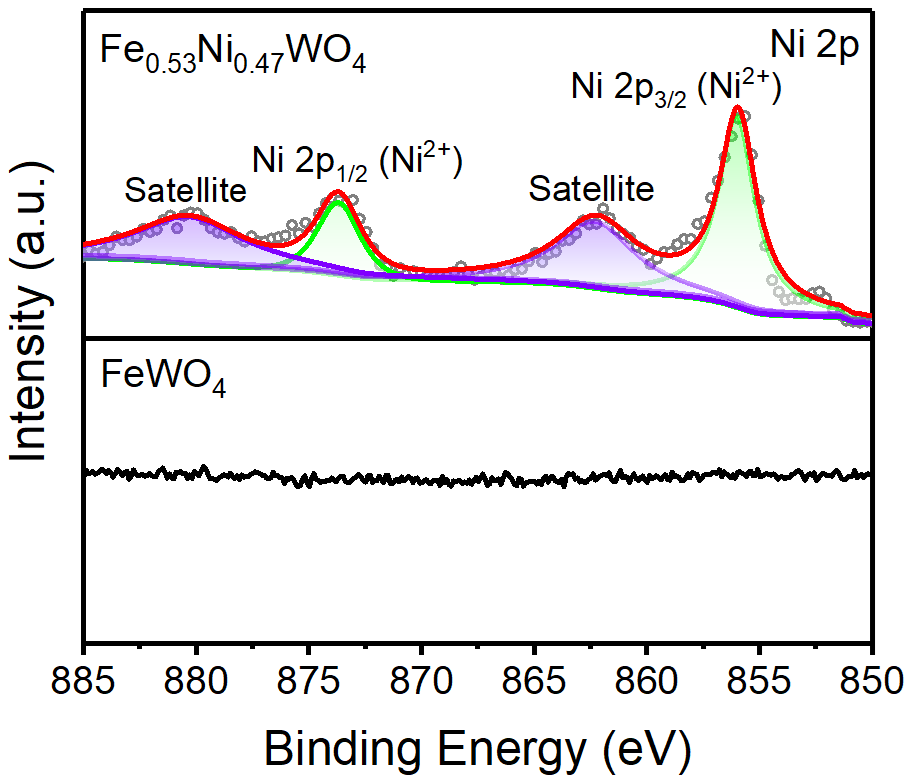


**Supplementary Fig. 10** XPS fine spectra of Ni 2p of FeWO4 and Fe0.53Ni0.47WO4


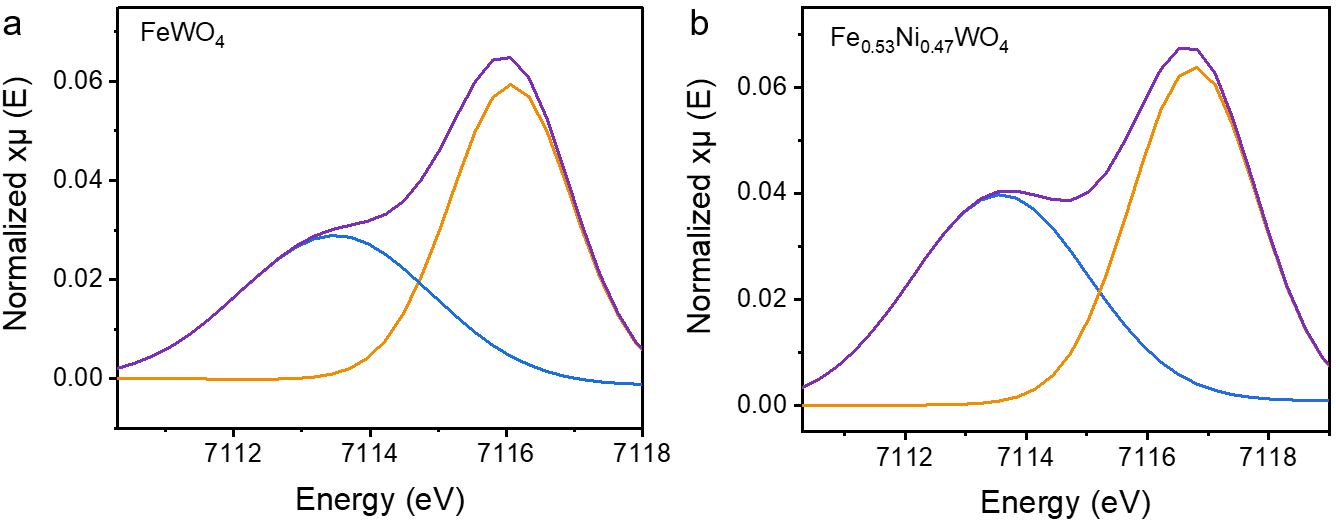


**Supplementary Fig. 11** Fe pre-K-edge curves of (a) FeWO4 and (b) Fe0.53Ni0.47WO4.


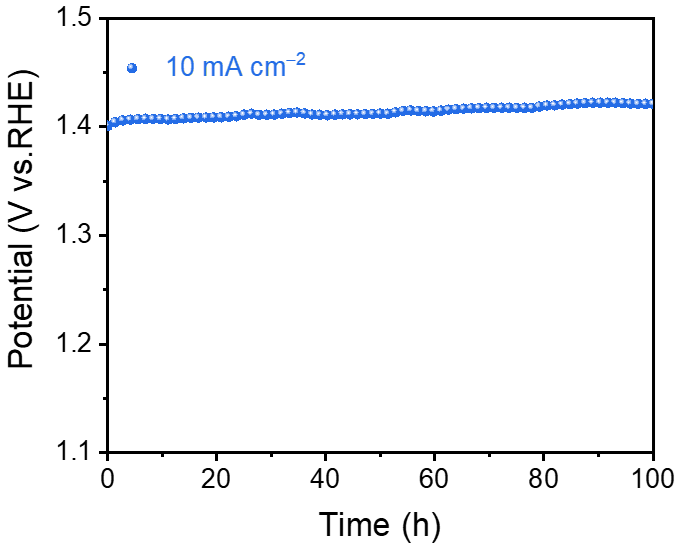


**Supplementary Fig. 12** (a) Chronopotentiometry curves of Fe0.53Ni0.47WO4/NF at 10 mA cm−2. Potential stabilizes at 1.42 mV (vs. RHE) with less than 2% decay over 100 hours.


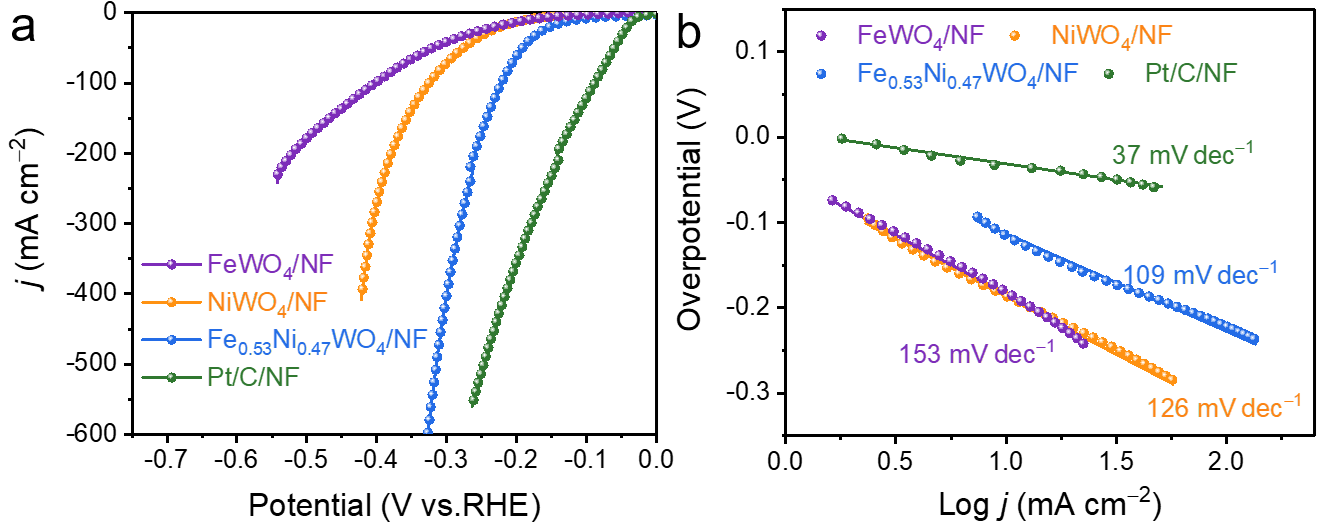


**Supplementary Fig. 13** (a) Hydrogen evolution reaction (HER) polarization curves of FeWO4/NF, NiWO4/NF, Fe0.53Ni0.47WO4/NF, and Pt/C/NF. (b) The corresponding Tafel slopes. The FeO6 octahedral distortion in FeWO4 caused by Ni substitution also promoted the HER activity. The HER overpotential of Fe0.53Ni0.47WO4/NF is 66 mV lower than that of FeWO4/NF, and the Tafel of Fe0.53Ni0.47WO4/NF is 109 mV dec-1.


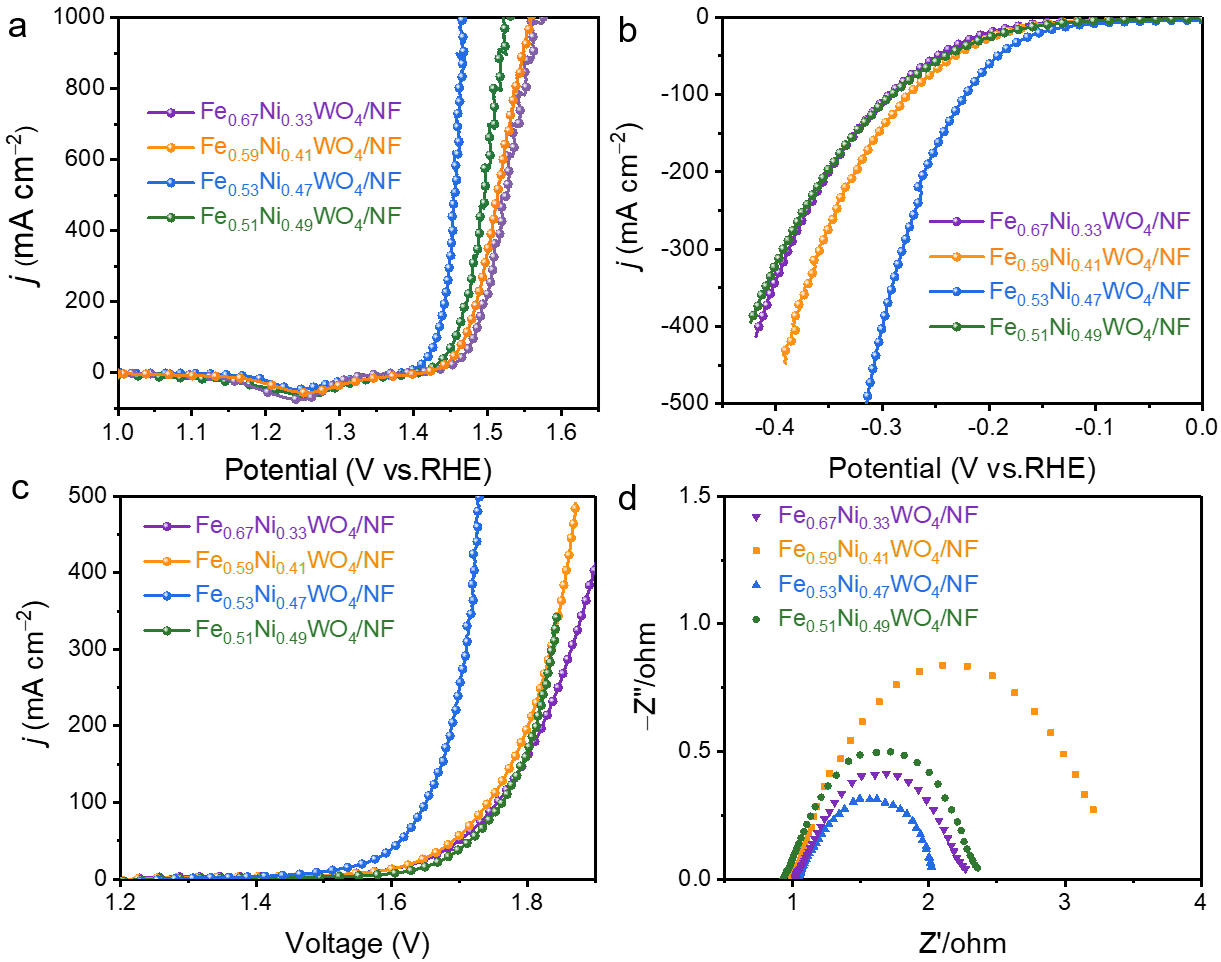


**Supplementary Fig. 14** OER (a), HER (b), and water splitting polarization curves (c) of Fe0.67Ni0.33WO4/NF, Fe0.59Ni0.41WO4/NF, Fe0.53Ni0.47WO4/NF, and Fe0.51Ni0.49WO4/NF. (d) The corresponding EIS Nyquist curves of OER.


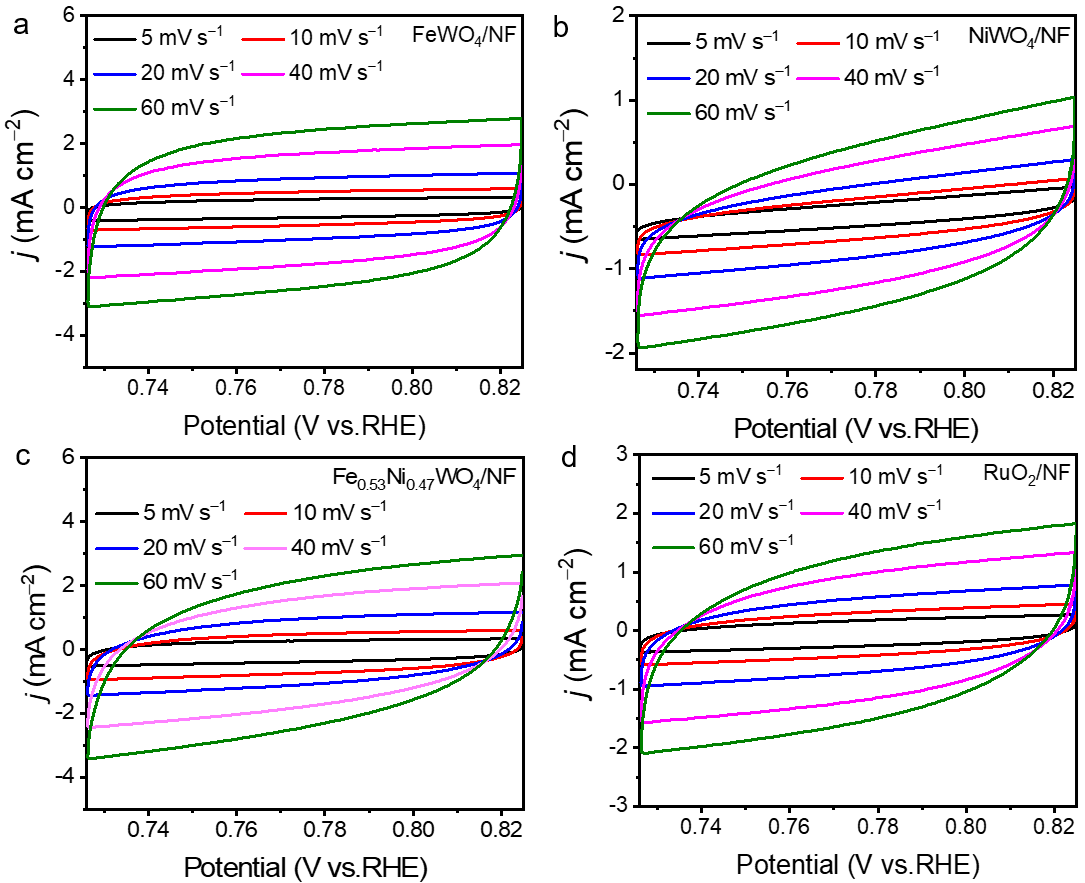


**Supplementary Fig. 15** Cyclic voltammograms of (a) FeWO4/NF, (b) NiWO4/NF , (c) Fe0.53Ni0.47WO4/NF, and (d) RuO2/C/NF at various scan rates (5, 10, 20, 40, 60, and 120 mV s−1) in the potential range of 0.726-0.825 V vs. RHE, which were used to estimate double-layer capacitance (Cdl).

3
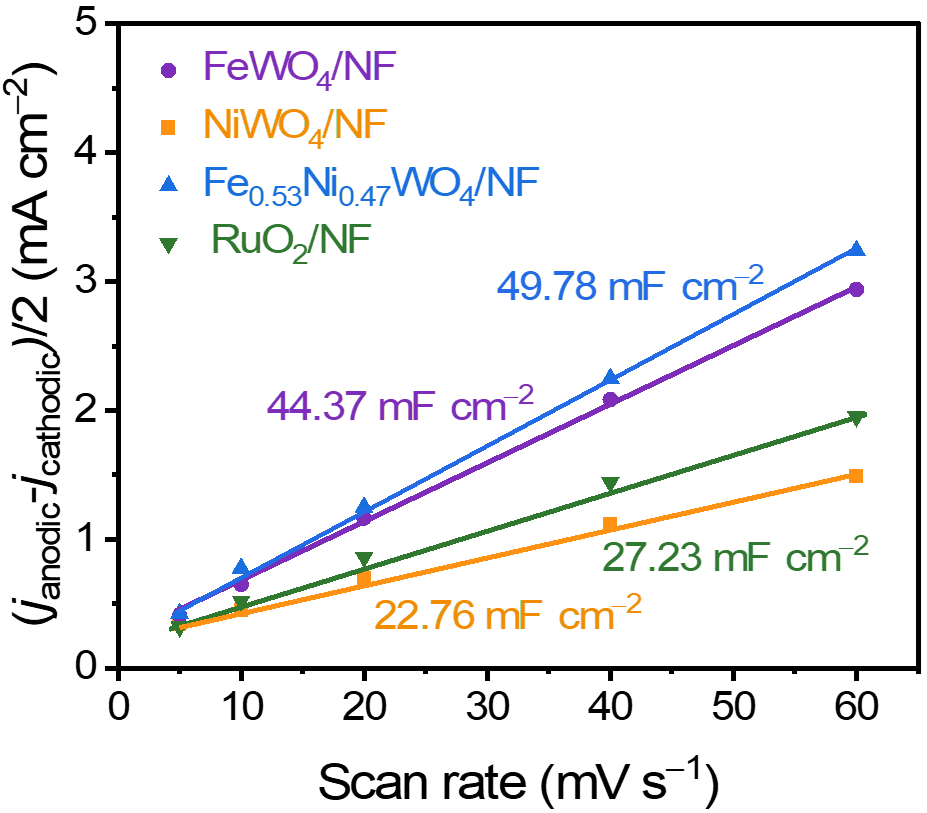


**Supplementary Fig. 16** Linear fitting of the current density versus scan rates of FeWO4/NF, NiWO4/NF, Fe0.53Ni0.47WO4/NF, RuO2/NF and corresponding Cdl. Ni substitution slightly increases the apparent active site number of the tungstate.


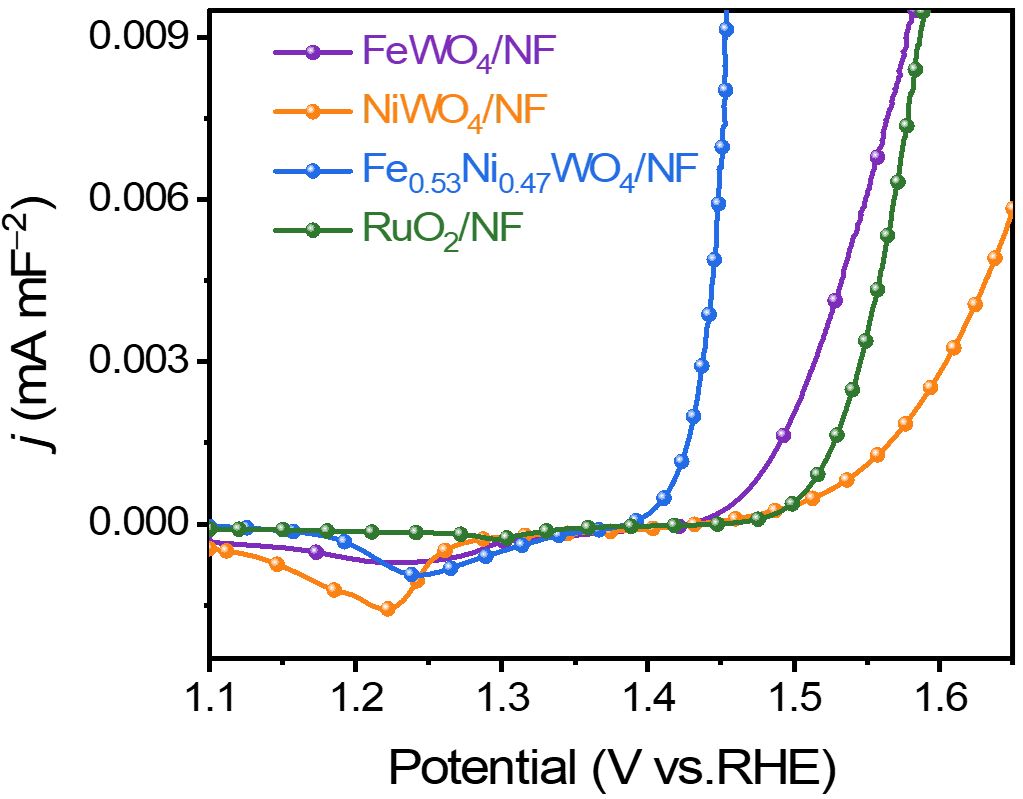


**Supplementary Fig. 17** Cdl normalized polarization curves of FeWO4/NF, NiWO4/NF, Fe0.53Ni0.47WO4/NF, and RuO2/NF.

**Supplementary Fig. 18** (a) Water splitting polarization curves of FeWO4/NF ‖ FeWO4/NF, NiWO4/NF ‖ NiWO4/NF, Fe0.53Ni0.47WO4/NF ‖ Fe0.53Ni0.47WO4/NF and Pt/C/NF ‖ RuO2/NF. (b) Chronopotentiometry curves of Fe0.53Ni0.47WO4/NF ‖ Fe0.53Ni0.47WO4/NF at 10 mA cm−2.


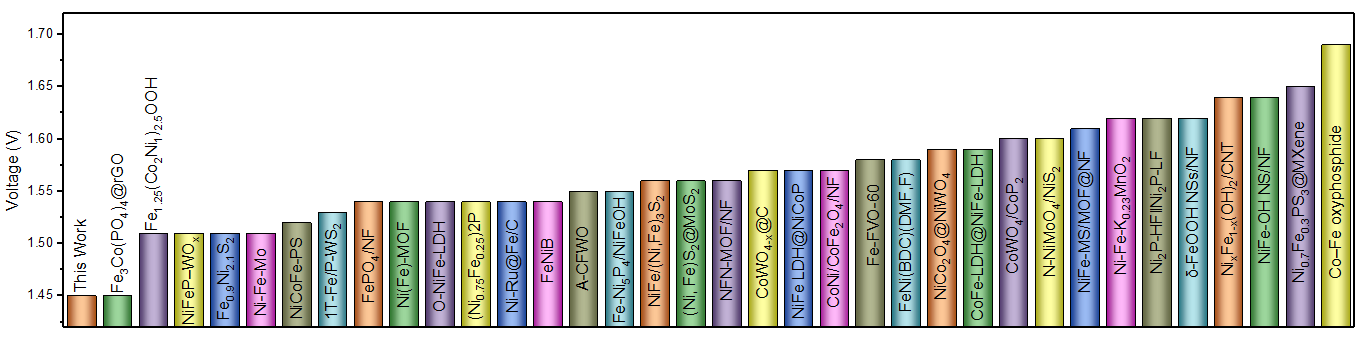


**Supplementary Fig. 19** Performance comparison of water splitting of Fe0.53Ni0.47WO4/NF ‖ pt/C/NF with other works.


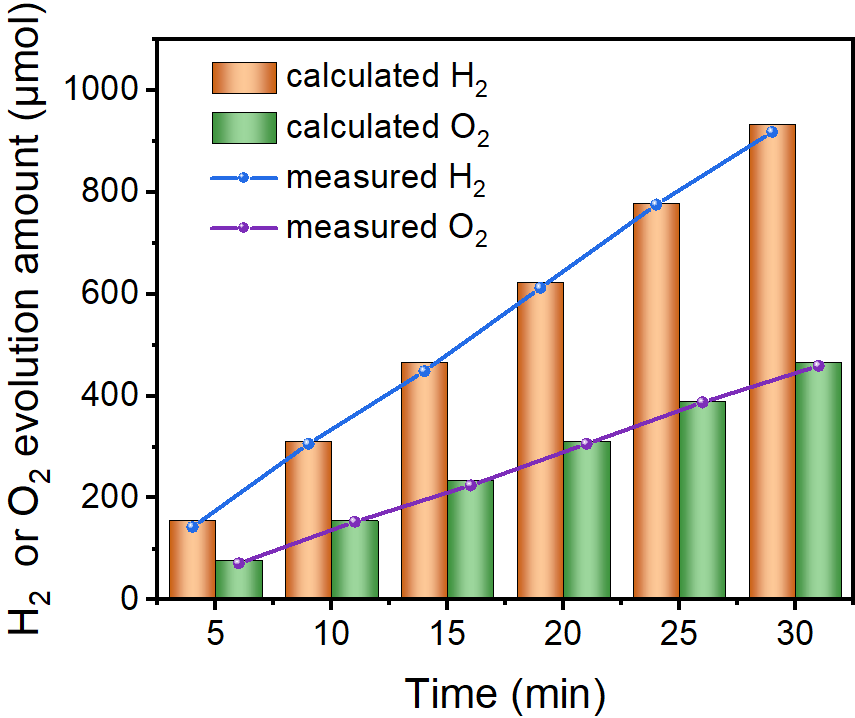


**Supplementary Fig. 20** Faraday efficiency of Fe0.53Ni0.47WO4/NF ‖ Pt/C/NF.

**Supplementary Fig. 21** (a) Raman spectra of Fe0.53Ni0.47WO4/NF before and after OER, (b) XRD patterns of Fe0.53Ni0.47WO4/NF before and after OER. The peak located at about 887 cm−1, assigning to symmetric stretching vibrations of terminal W=O bonds2.


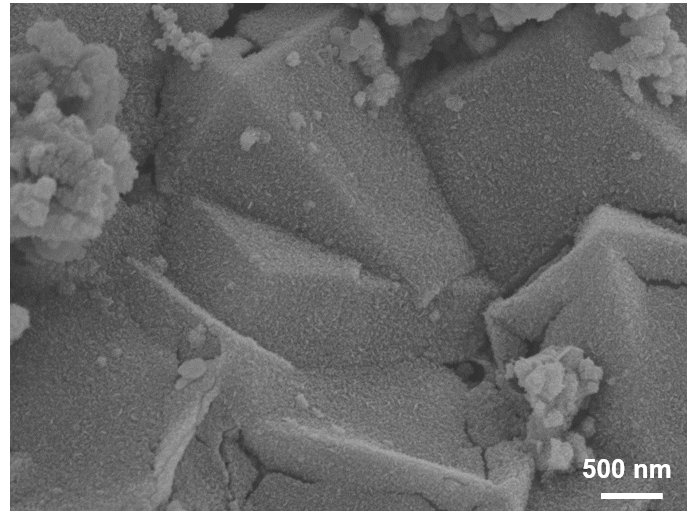


**Supplementary Fig. 22** SEM image of Fe0.53Ni0.47WO4/NF after OER.


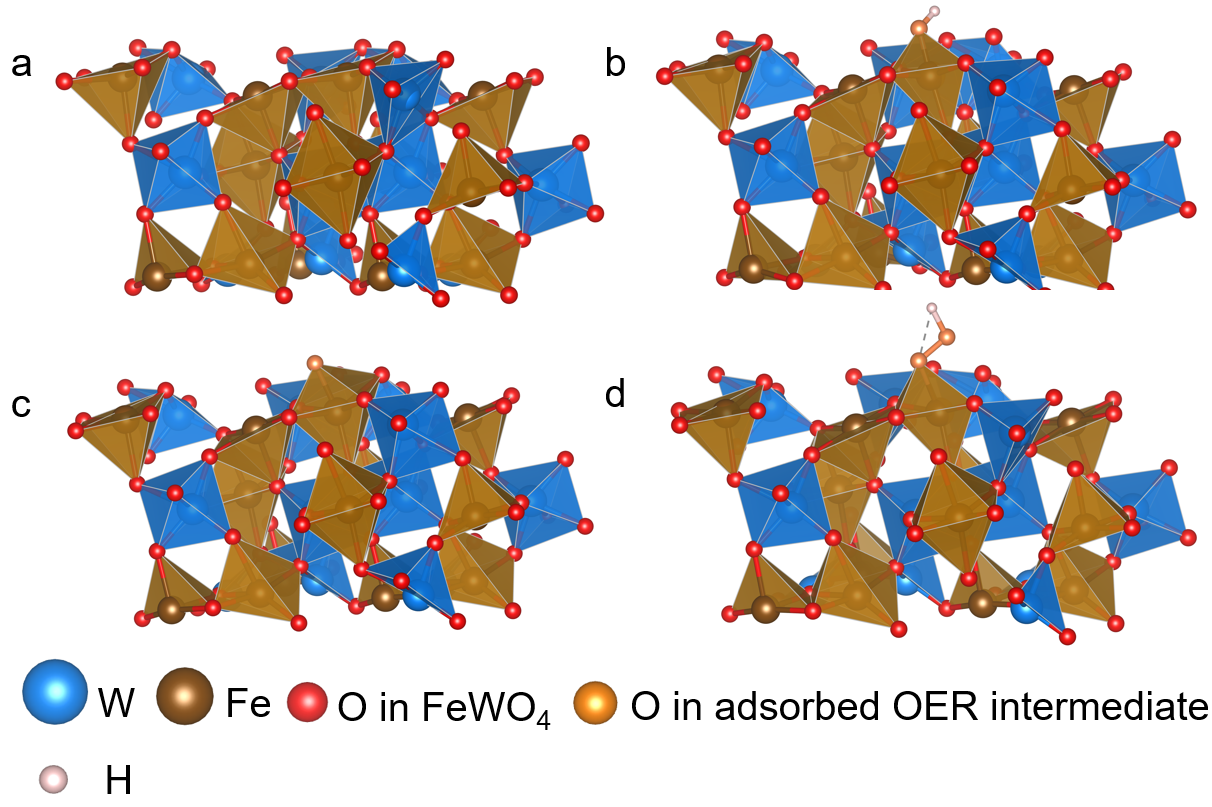


**Supplementary Fig. 23** (a) Relaxation structure of FeWO4. (b-d) Chemisorption models of *OH, *O, and *OOH on Fe site of the FeWO4.


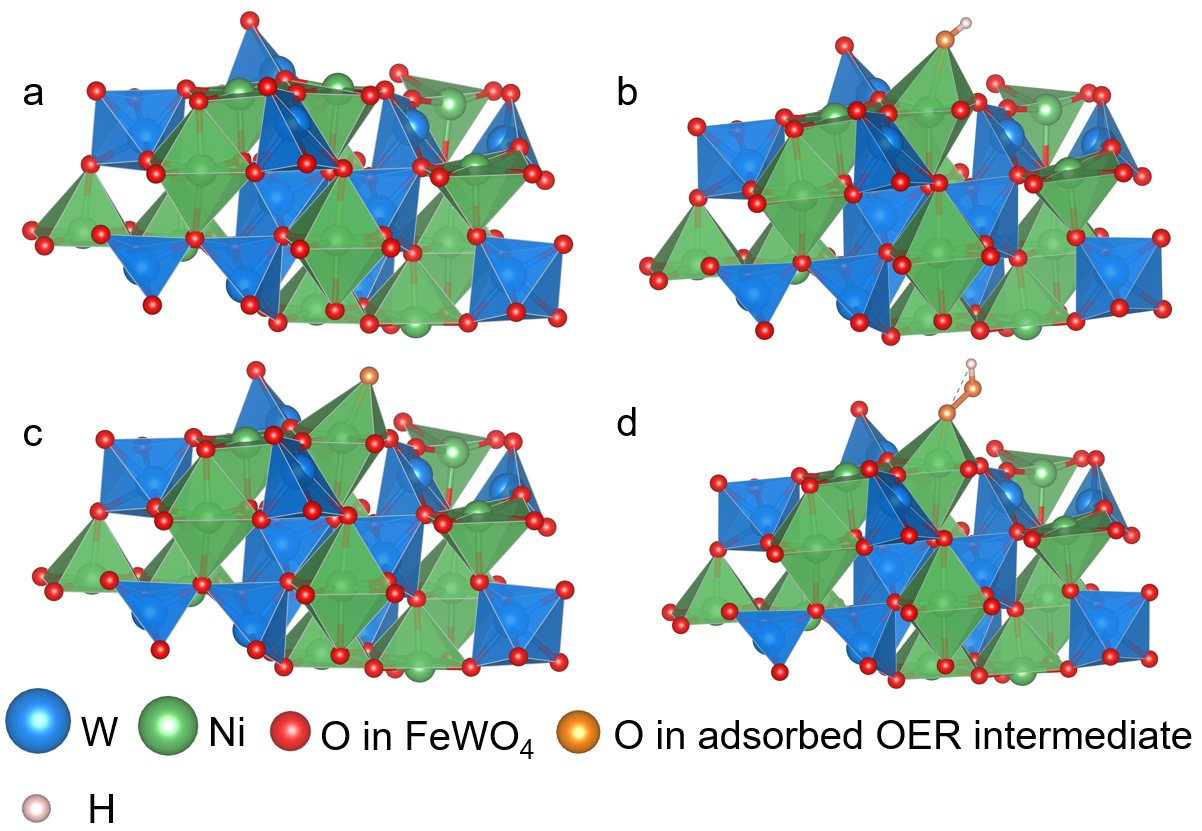


**Supplementary Fig. 24** (a) Relaxation structure of NiWO4. (b-d) Chemisorption models of *OH, *O, and *OOH on Ni site of the NiWO4.


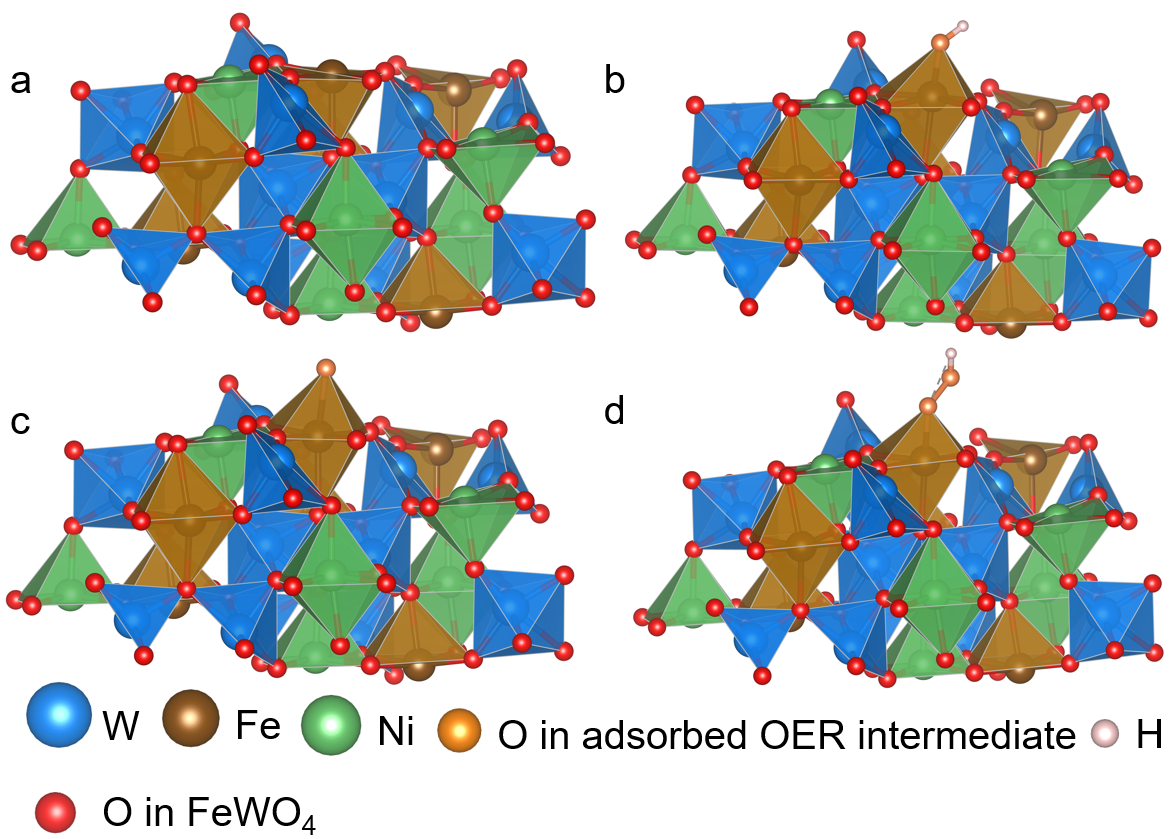


**Supplementary Fig. 25** (a) Relaxation structure of Fe0.53Ni0.47WO4. (b-d) Chemisorption models of *OH, *O, and *OOH on Fe site of the Fe0.53Ni0.47WO4.


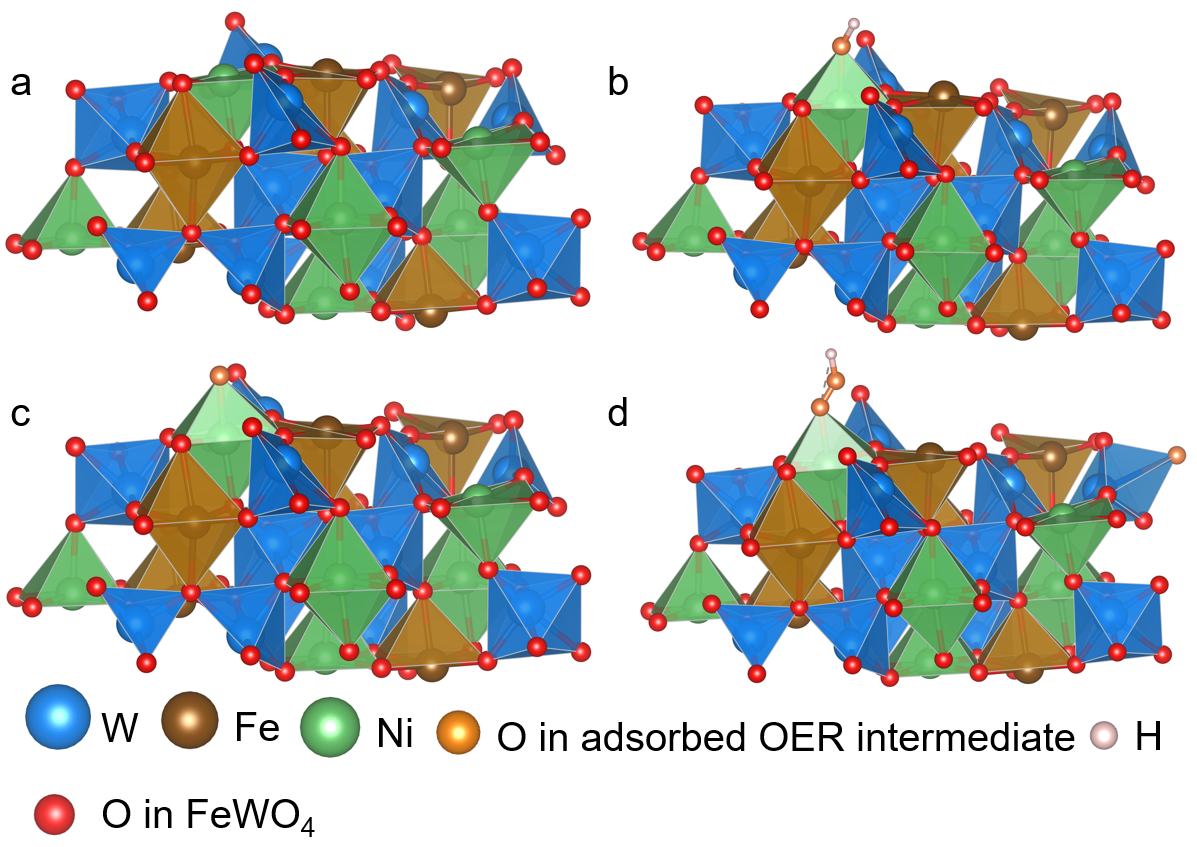


**Supplementary Fig. 26** (a) Relaxation structure of Fe0.53Ni0.47WO4. (b-d) Chemisorption models of *OH, *O, and *OOH on Ni site of the Fe0.53Ni0.47WO4.


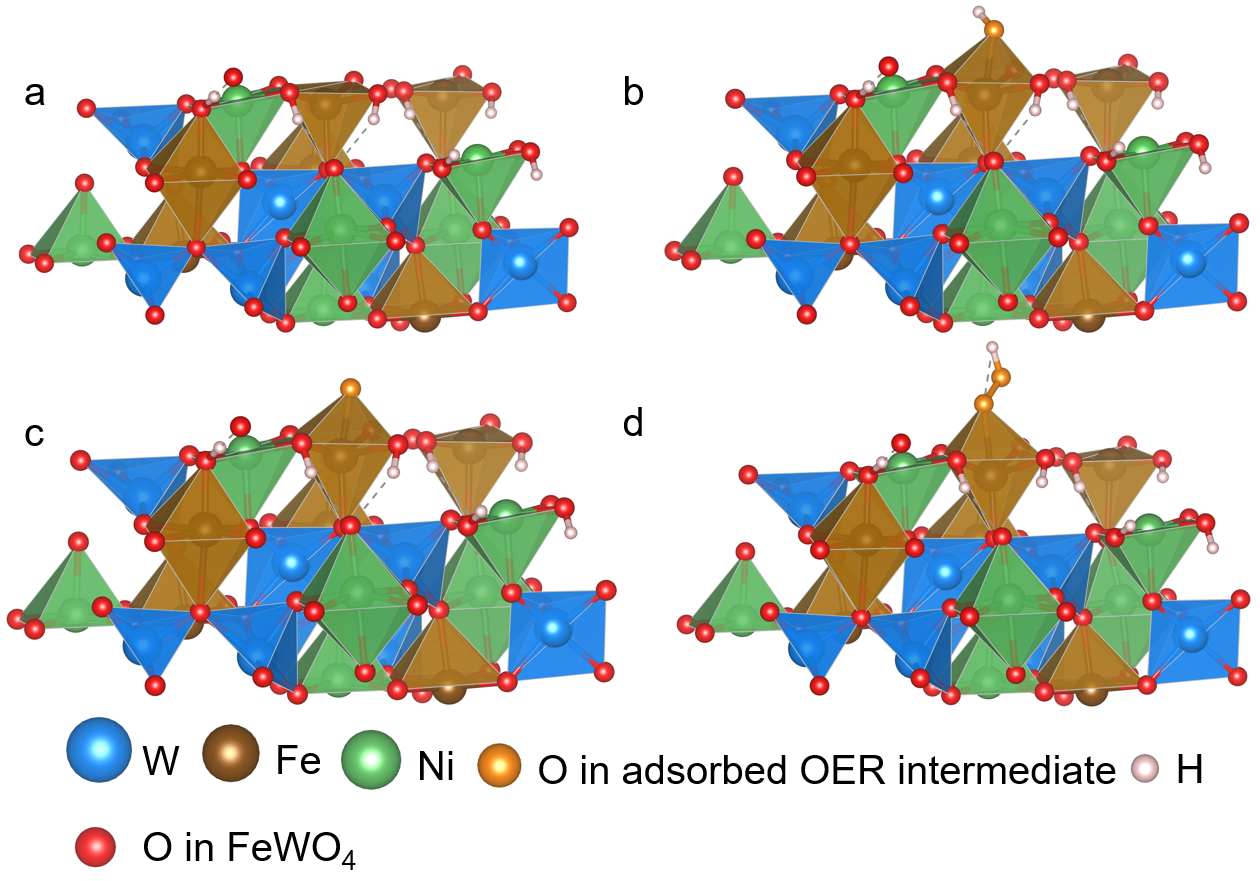


**Supplementary Fig. 27** (a) Relaxation structure of surface hydroxylated Fe0.53Ni0.47WO4. (b-d) Chemisorption models of *OH, *O, and *OOH on Fe site of the surface hydroxylated Fe0.53Ni0.47WO4.


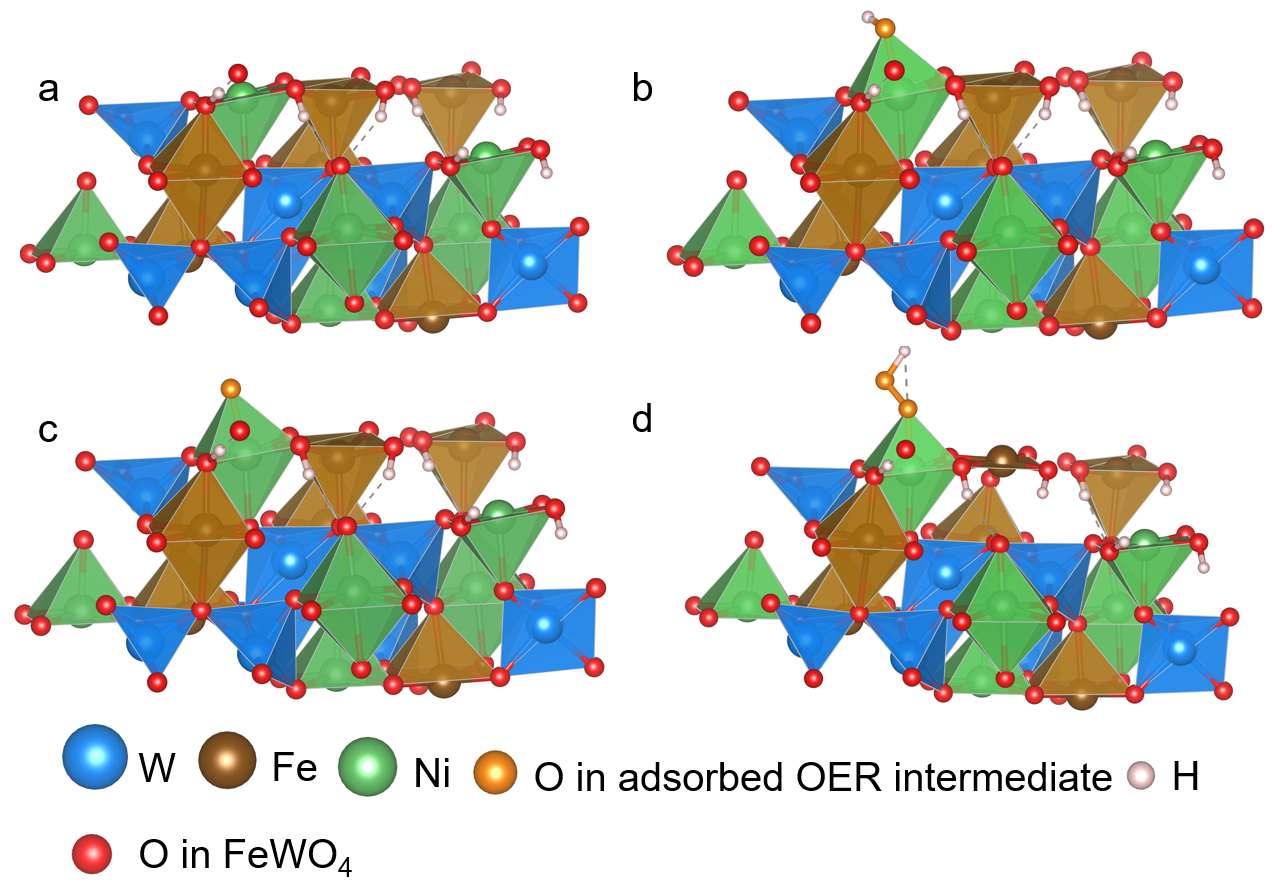


**Supplementary Fig. 28** (a) Relaxation structure of surface hydroxylated Fe0.53Ni0.47WO4. (b-d) Chemisorption models of *OH, *O, and *OOH on Ni site of the surface hydroxylated Fe0.53Ni0.47WO4.


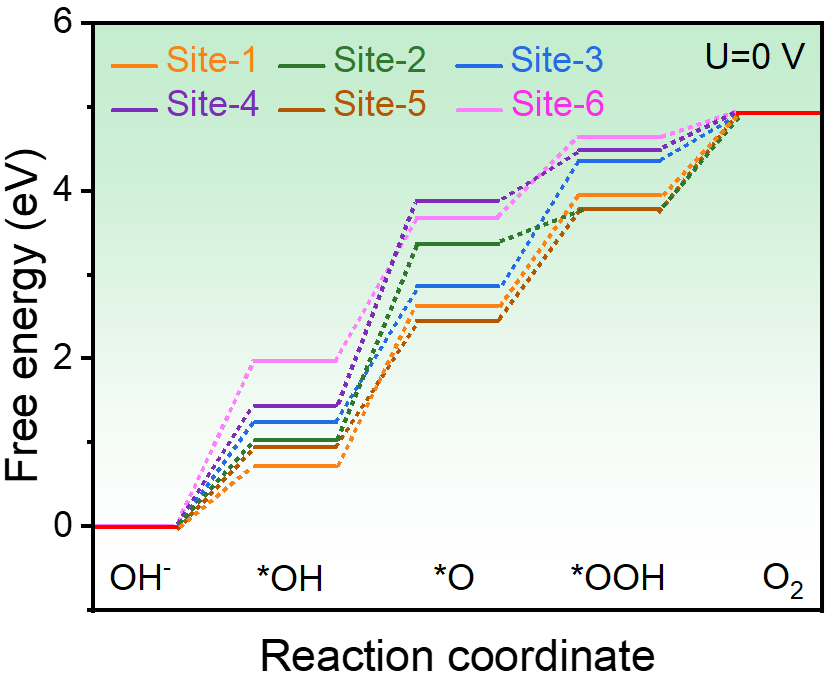


**Supplementary Fig. 29** Free Energy profiles of different OER intermediates at 0 V (Site-1~Site-6 represent Fe sites in FeWO4, Ni sites in NiWO4, Fe sites in Fe0.53Ni0.47WO4, Ni sites in Fe0.53Ni0.47WO4, Fe sites in FeOOH, Ni sites in NiOOH, respectively).

Williamson-Hall plot：

Where β is the full width at half maxima, λ is the wavelength of x-ray, D is crystallite size, and ε is the lattice strain.

Table S1. The atomic ratio of Fe and Ni in FexNi1-xWO4 obtained by ICP-OES.

| Dosage of precursor | Fe | Ni |
| --- | --- | --- |
| 1 mmol | 0.67 | 0.33 |
| 2 mmol | 0.59 | 0.41 |
| 3 mmol | 0.53 | 0.47 |
| 4 mmol | 0.51 | 0.49 |

Table S2. Parameters of XRD refinement by Rietveld method.

|  | FeWO4 | Fe0.53Ni0.47WO4 |
| --- | --- | --- |
| a (Å) | 4.722 | 4.720 |
| b (Å) | 5.703 | 5.718 |
| c (Å) | 4.966 | 4.979 |
| α (°) | 90.000 | 90.000 |
| β (°) | 89.991 | 90.070 |
| γ (°) | 90.000 | 90.000 |
| Unit-cell volume (Å3) | 133.728 | 134.348 |
| Rwp (%) | 3.540 | 3.440 |
| χ2 | 3.110 | 3.460 |

Table S3. Fe–O bond length and distortion change of FeO6 octahedral in FeWO4 andFe0.53Ni0.47WO4.

|  | FeWO4 | Fe0.53Ni0.47WO4 |
| --- | --- | --- |
| Fe–O (B1) (Å) | 2.144 | 2.157 |
| Fe–O (B2) (Å) | 2.154 | 2.204 |
| Fe–O (B3) (Å) | 2.076 | 2.041 |
| Average (Ba) (Å) | 2.125 | 2.134 |
| Distortion Degree | 0.032 | 0.062 |

Table S4. Performance comparison of this work and recently reported non-noble metal materials for electrocatalytic OER in the alkaline environment.

| Catalyst | η10 (mV) | η100 (mV) | η500 (mV) | η1000 (mV) | Tafel  (mV dec−1) | Reference |
| --- | --- | --- | --- | --- | --- | --- |
| Fe0.53Ni0.47WO4 | 170 | 203 | 223 | 240 | 35 | **This work** |
| Ni0.8Fe0.2-AHNA | 210 | 235 | 248 | 258 | 34.7 | Energy Environ. Sci. 2020, 13, 86–95. |
| Ni83Fe17-ONCAs | 190 | 225 | 255 | 265 | 48 | Adv. Mater. 2021, 33, 2007377. |
| (Ni,Fe)OOH | 175 | 210 | 259 | 289 | 41.5 | Energy Environ. Sci, 2018, 11, 2858-2864. |
| SSW-12 h | 220 | 257 | 260 | / | 39 | Adv. Energy Mater. 2020, 10, 1904020. |
| Co3O4/Fe0.33Co0.66P | 185 | 230 | 275 | / | 59.8 | Adv. Mater. 2018, 30, 1803551. |
| FeP/Ni2P | 190 | 230 | 290 | 300 | 22.7 | Nat. Commun. 2018, 9, 2551. |
| NiCe@NiFe | 220 | 254 | 290 | 315 | 59.9 | Appl. Catal. B-Environ. 2020, 260, 118199. |
| NiFe LDH/NiS | 220 | 386 | 290 | 325 | 60.1 | Adv. Energy Mater. 2021, 2102353. |
| NiFeMo IOS@NF | 198 | 220 | 293 | / | 36 | Appl. Catal. B-Environ. 2020, 267, 118376. |
| MFN-MOFs(2:1)/NF | 235 | 240 | 294 | / | 55.4 | Nano Energy 2019, 57, 1–13. |
| Ni3N@2M-MoS2 | 170 | 215 | 300 | 330 | 38.9 | Adv. Mater. 2022, 34, 2108505. |
| NiFe LDH/MXene/NF | 240 | 270 | 300 | / | 44 | Nano Energy 2019, 63, 103880. |
| Ni–Fe NP | 200 | 280 | 320 | / | 58 | Nat. Commun. 2019, 10, 5599. |
| DMsA | 205 | 250 | 330 | / | 34 | Energy Environ. Sci. 2020, 13, 2200–2208. |
| Co4N-CeO2 | 239 | 290 | 350 | / | 37.1 | Adv. Funct. Mater. 2020, 30, 1910596. |
| (NiCo)3Se4 | 270 | 320 | 360 | 329 | 42 | Adv. Mater. 2021, 33, 2103812. |
| NFN-MOF/NF | 240 | 290 | 360 | / | 58.8 | Adv. Energy Mater. 2018, 8, 1801065. |
| NiMoOx/NiMoS | 186 | 220 | 370 | 430 | 34 | Nat. Commun. 2020, 11, 5462. |
| Ni–P–B/paper | 240 | 280 | 375 | 375 | 70.6 | Energy Environ. Sci, 2020, 13, 102-110. |
| NiVIr-LDH | 210 | 260 | 375 | / | 38 | Nat. Commun. 2019, 10, 3899. |
| (CrFeCoNi)97O3 O-HEA | 196 | 300 | 400 | / | 29 | Adv. Mater. 2021, 33, 2101845. |
| Ni–Mo–B HF | 293 | 290 | 407 | 460 | 79 | Adv. Funct. Mater. 2021, 2107308. |
| Ni0.9Co0.1(OH)2 | 250 | 320 | 424 | / | / | Nat. Energy 2019, 4, 786–795 |
| NiFe LDH | 200 | 260 | / | / | 24 | Adv. Mater. 2019, 31, 1903909. |
| LSC&MoSe2 | 370 | 480 | / | / | 77 | Nat. Commun. 2019, 10, 1723. |
| LSC/K-MoSe2 | 280 | 375 | / | / | 79 | Nat. Commun. 2021, 12, 4606. |
| Fe3Co(PO4)4@rGO | 220 | 250 | / | / | 57 | Nat. Commun. 2019, 10, 5195. |
| NiS0.5Se0.5 | 257 | 320 | / | / | 61 | Adv. Mater. 2020, 32, 2000231. |
| w-Ni(OH)2 | 237 | 280 | / | / | 33 | Nat. Commun. 2019, 10, 2149. |
| FeP-CoP/NC | 230 | 390 | / | / | 73 | Nat. Commun. 2021, 12, 4143. |
| NiCoFe-NDA/NF | 215 | 270 | / | / | 50.7 | Energy Environ. Sci. 2021, 14, 6546–6553. |
| Fe-Co3O4 | 262 | 305 | / | / | 43 | Adv. Mater. 2020, 32, 2002235. |
| S|NiNx-PC/EG | 280 | 330 | / | / | 45 | Nat. Commun. 2019, 10 1392. |
| FeCoNi-HNTAs | 184 | 350 | / | / | 49.9 | Nat. Commun. 2018, 9, 2452. |
| CoCu-MOF NBs | 260 | 320 | / | / | 63.5 | Angew. Chem. Int. Edit. 2021, 60, 26397–26402. |
| MOF-Fe/Co | 220 | 300 | / | / | 52 | Angew. Chem. Int. Edit. 2021, 60, 12097–12102. |
| NiCo2xFexO4 NBs | 274 | 308 | / | / | 42 | Angew. Chem. Int. Edit. 2021, 60, 11841–11846. |
| NiFc-MOF/NF | 195 | 241 | / | / | 44.1 | Angew. Chem. Int. Edit. 2021, 60, 12770–12774. |
| Ni(CN)2/NiSe2 | 250 | 470 | / | / | 68 | Angew. Chem. Int. Edit. 2021, 60, 23444. |
| NiCo2S4/ZnS | 140 | 210 | / | / | 47 | Angew. Chem. Int. Edit. 2021, 60, 19435. |
| NiFe-Boride | 167 | 230 | / | / | 25 | Nat. Commun. 2021, 12, 6089. |
| γ-FeOOH/NF-X | 280 | 310 | / | / | 52 | Adv. Mater. 2021, 33, 2005587. |
| cMOF/LDH-48 | 195 | 227 | / | / | 34.1 | Adv. Mater. 2021, 33, 2006351. |
| W-NiS0.5Se0.5 | 171 | 239 | / | / | 41 | Adv. Mater. 2022, 2107053. |
| CoCuFeMoOOH@Cu | 199 | 250 | / | / | 48.8 | Adv. Mater. 2021, 33, 2100745. |
| CoNiFeCu | 291 | 345 | / | / | 43.9 | Adv. Mater. 2022, 2109108. |
| NiFeV nanofibers | 181 | 395 | / | / | 62 | Angew. Chem. Int. Edit. 2022, 134, 202115331. |
| LiCoO1.8Cl0.2 | 240 | 278 | / | / | / | Nat. Catal. 2021, 4, 212–222 |
| HG-NiFe | 310 | 350 | / | / | 39 | Sci. Adv. 2018, 4, 7970 |
| CaCoO3 | 260 | 350 | / | / | 38 | Sci. Adv. 2019, 5, 6262 |
| Co3Sn2S2 | 299 | 370 | / | / | 74 | Sci. Adv. 2019, 5, 9867 |
| Co-TiO2 | 332 | 396 | / | / | / | Nat. Catal. 2021, 4, 36–45 |
| Br-Ni-MOF(A) | 306 | 480 | / | / | 79.1 | Sci. Adv. 2021, 7, 0919 |
| LBSCOF | 423 | 518 | / | / | 115 | Chem. 2018, 4, 2902–2916 |
| Fe-O2 cat | 238 | 537 | / | / | 82.7 | Chem. 2018, 4, 1139–1152 |
| Zn0.2Co0.8OOH | 235 | / | / | / | 34.7 | Nat. Energy 2019, 4, 329–338 |

References

1. F. He, S. Weon, W. Jeon, M. W. Chung, W. Choi, Self-wetting triphase photocatalysis for effective and selective removal of hydrophilic volatile organic compounds in air. Nat. Commun. 12, 6259 (2021).

2. W. Shao, Y. Xia, X. Luo, L. Bai, J. Zhang, G. Sun, C. Xie, X. Zhang, W. Yan, Y. Xie, Structurally distorted wolframite-type CoxFe1-xWO4 solid solution for enhanced oxygen evolution reaction. Nano Energy 50, 717−722 (2018).
